# Supplementary material
Source: PubMed Central journal article supplement (PMC5642272)
Supplement: jp7b05933_si_001.pdf [file jp7b05933_si_001.pdf]

**Supporting Information for**

**Cloud Processing of Secondary Organic Aerosol from Isoprene  
and Methacrolein Photooxidation**

Chiara Giorio<sup>1,2\*</sup>, Anne Monod<sup>2</sup>, Lola Brégonzio-Rozier<sup>3</sup>, Helen Langley DeWitt<sup>2</sup>, Mathieu Cazaunau<sup>3</sup>,  
Brice Temime-Roussel<sup>2</sup>, Aline Gratien<sup>3</sup>, Vincent Michoud<sup>3</sup>, Edouard Pangui<sup>3</sup>, Sylvain Ravier<sup>2</sup>, Arthur T.  
Zielinski<sup>1</sup>, Andrea Tapparo<sup>4</sup>, Reinhilde Vermeylen<sup>5</sup>, Magda Claeys<sup>5</sup>, Didier Voisin<sup>6</sup>, Markus Kalberer<sup>1</sup>  
and Jean-François Doussin<sup>3</sup>

<sup>1</sup> Department of Chemistry, University of Cambridge, Cambridge CB2 1EW, UK

<sup>2</sup> Aix Marseille Univ, CNRS, LCE, Marseille, France

<sup>3</sup> Laboratoire Interuniversitaire des Systèmes Atmosphériques (LISA), UMR7583, CNRS, Université Paris-Est-Créteil (UPEC) et Université Paris Diderot (UPD), Institut Pierre Simon Laplace (IPSL), Créteil, France

<sup>4</sup> Dipartimento di Scienze Chimiche, Università degli Studi di Padova, Padova, 35131, Italy

<sup>5</sup> Department of Pharmaceutical Sciences, University of Antwerp (Campus Drie Eiken), Universiteitsplein 1, BE-2610 Antwerp, Belgium

<sup>6</sup> Universités Joseph Fourier-Grenoble 1-CNRS, UMR5183, Laboratoire de Glaciologie et Géophysique de l'Environnement, 38402 Saint Martin d'Hères, France

\*Correspondence to: C. Giorio ([chiara.giorio@atm.ch.cam.ac.uk](mailto:chiara.giorio@atm.ch.cam.ac.uk))

# S1 Experimental section

## S1.1 Details of Isoprene experiments

Table S1. Type of experiments, experimental conditions, SOA yields, generated clouds and instrumental analysis (mass spectrometry) of SOA for isoprene experiments.

| Experiments                             | [VOC] <sub>0</sub> <sup>a</sup> | [HONO] <sub>0</sub> | [NO] <sub>0</sub> | [NO <sub>2</sub> ] <sub>0</sub> | [O <sub>3</sub> ] <sub>max</sub> | ΔM <sub>0</sub> <sup>b,c</sup> | T    | RH  | N clouds | MS measurements <sup>d</sup> |       |
|-----------------------------------------|---------------------------------|---------------------|-------------------|---------------------------------|----------------------------------|--------------------------------|------|-----|----------|------------------------------|-------|
|                                         | ppb                             | ppb                 | ppb               | ppb                             | ppb                              | μg/m <sup>3</sup>              | °C   | %   |          | AMS                          | GC-MS |
| <b>Blanks</b>                           |                                 |                     |                   |                                 |                                  |                                |      |     |          |                              |       |
| <b>B-120115</b>                         | 0                               | 137                 | 195               | 104                             | 2                                | <0.3                           | 19.6 | 0   | -        | N                            | Y     |
| <b>Isoprene - Control experiment</b>    |                                 |                     |                   |                                 |                                  |                                |      |     |          |                              |       |
| <b>IC-040315</b>                        | 755                             | 223                 | 165               | 93                              | 306                              | 4.9                            | 20.2 | 0.5 | -        | N                            | Y     |
| <b>Isoprene - Diphasic experiments</b>  |                                 |                     |                   |                                 |                                  |                                |      |     |          |                              |       |
| <b>ID-300113<sup>e</sup></b>            | 817                             | 161                 | 95                | 71                              |                                  | <0.1                           |      | 4-3 | 2        | Y                            | Y     |
| <b>ID-010213<sup>e</sup></b>            | 800                             | 133                 | 103               | 49                              |                                  | <0.1                           |      | 2-1 | 2        | Y                            | Y     |
| <b>Isoprene - Triphasic experiments</b> |                                 |                     |                   |                                 |                                  |                                |      |     |          |                              |       |
| <b>IT-090113<sup>e,f</sup></b>          | 375                             | 2.2                 | 44                | 0                               | 94                               | 4.3                            | 21.9 | 0   | 2        | Y                            | Y     |
| <b>IT-160113<sup>e,f</sup></b>          | 846                             | 15                  | 143               | 27                              | 122                              | <0.1                           |      |     | 1        | Y                            | Y     |
| <b>IT-280113<sup>e,f</sup></b>          | 833                             | 125                 | 88                | 45                              | 201                              | 2.8                            |      | 3-2 | 2        | Y                            | Y     |
| <b>IT-160614</b>                        | 850                             | 161                 | 91                | 154                             | 212                              | 5.5                            | 23.1 | 9   | 2        | Y                            | Y     |

<sup>a</sup> Measurement uncertainty is 15 ppb. <sup>b</sup> SOA concentration with effective density of 1.4 g/cm<sup>3</sup>. <sup>c</sup> Measurement uncertainty is 0.1 μg/m<sup>3</sup>. <sup>d</sup> Y=yes, N=no. <sup>e</sup> (Brégonzio-Rozier et al., 2016). <sup>f</sup> (Brégonzio-Rozier et al., 2015)

## S1.2 Principal Component analysis

Principal component analysis (PCA) was applied to time-series of the concentrations of organics, nitrate and ammonium to extract the underlying factors, or latent variables, contributing to the timeseries of organics in high humidity conditions (i.e. production of SOA vs. evaporative losses). The latent variables, hereafter called principal components, are orthogonal linear combinations of the original variables in which the first component (PC 1) explains most of the variance of the dataset and the second component (PC 2) explains most of the residual variance (Wold et al., 1987). PCA was performed using the package “R commander” in R 3.2.5 on three variables (concentrations of organics, nitrate and ammonium measured with the HR-ToF-AMS) and 284 cases for experiment MT-180113, 249 cases for experiment MT-210113 and 251 cases for experiment MT-230113. For all three experiments the first two components were selected on the basis of the scree plots (not shown), explaining 98-99% of the variance of the datasets (66-72% by PC 1).

Principal components were used to disaggregate production of organic aerosol during clouds (explained by PC 1) from the production of organic aerosol in dry conditions and evaporative losses (both explained by PC 2). In order to do so, the weighted (by multiplying for the PC loadings for organics) sum of scores of the three principal components (explaining 100% of variance) was scaled to match the total amount of organics measured by the HR-ToF-AMS for each case using a linear regression ( $r^2=1$ ). The PC 1 corrected scores were then used to estimate the production of organic aerosol during cloud events corrected for evaporative losses (PC 2).

## S1.3 Aqueous phase experiments

Aqueous phase experiments were performed using a photoreactor (detailed in Renard et al. (2013)). The reactor was a 450 cm<sup>3</sup> Pyrex thermostated photoreactor, equipped with a 1000 W Xenon arc lamp (LOTORiel, LSH 601) and a glass filter (ASTM Air Mass 1.5), simulating the solar irradiation in the UV-visible wavelengths at ground level. All experiments were performed at 25 °C, and started with irradiation of UHQ water (18.2 MΩ cm, Millipore). Then H<sub>2</sub>O<sub>2</sub> (Acros, 30%, non-stabilized) was introduced, and after 10 min of H<sub>2</sub>O<sub>2</sub> photolysis, methacrolein (Sigma Aldrich, 95%) was introduced at time 0. The experiments were carried out with methacrolein initial concentrations of 20 mM (thus corresponding to 960 mgC/L). The 50 cm<sup>3</sup> gas-phase head space of the photoreactor was opened to ambient air for a few seconds during each sampling. We verified in control experiments that this procedure induced insignificant losses of methacrolein (MACR) from the solution. Due to the very fast reactivity of MACR added to the fact that the photoreactor was closed most of the time, this procedure induced a significant decrease in the dissolved O<sub>2</sub> concentrations, down to 0.5 mg/L after 30 minutes of reaction, in a similar way as in experiments performed with methylvinyl ketone (Renard et al., 2013). The initial H<sub>2</sub>O<sub>2</sub> concentrations were chosen in order to obtain a ratio [H<sub>2</sub>O<sub>2</sub>]<sub>0</sub> / [MACR]<sub>0</sub> = 20, in order to favor ·OH reaction with MACR rather than with H<sub>2</sub>O<sub>2</sub> by more than 80%. Under these conditions, we estimate that the ·OH concentrations were approximately 10<sup>-14</sup> – 10<sup>-13</sup> M, in the range of the estimated values for fog droplets to wet aerosol conditions (Arakaki et al., 2013; Ervens et al., 2014; Herrmann et al., 2015, 2010).

## S2 Results

### S2.1 Evaporative losses at high RH and SOA production during cloud events

**Table S2. Increase of concentration of VOCs and decrease of aerosol mass upon increase of RH from <5% to 80-90% before cloud formation.**

| Experiments | Δ[VOCs] <sup>a</sup><br>μg/m <sup>3</sup> | [SOA] <sup>b</sup> loss<br>μg/m <sup>3</sup> | [SOA] <sup>b</sup> loss<br>% |
|-------------|-------------------------------------------|----------------------------------------------|------------------------------|
| MT-180113   | 494                                       | -18.2                                        | -31%                         |
| MT-210113   | 454                                       | -21.2                                        | -32%                         |
| MT-230113   | 381                                       | -6.7                                         | -25%                         |

<sup>a</sup> Measurement uncertainty ~50%. <sup>b</sup> SMPS measurements.

**Table S3. Decrease of gas phase concentrations of VOCs and SOA production during clouds events measured with AMS and extrapolated with PCA by correcting for evaporative losses.**

| Experiments<br>Events | Δ[VOCs] <sup>a</sup><br>μg/m <sup>3</sup> | [NO <sub>3</sub> <sup>-</sup> ] <sub>max</sub><br>μg/m <sup>3</sup> | [NH <sub>4</sub> <sup>+</sup> ] <sub>max</sub><br>μg/m <sup>3</sup> | [Org.] <sub>max</sub> <sup>b</sup><br>measured<br>μg/m <sup>3</sup> | Δ[SOA]<br>measured<br>μg/m <sup>3</sup> | SOA mass<br>yields<br>(measured) | [Org.] <sub>max</sub><br>(PCA)<br>μg/m <sup>3</sup> | Δ[SOA]<br>(PCA)<br>μg/m <sup>3</sup> | SOA mass<br>yields<br>(PCA) |
|-----------------------|-------------------------------------------|---------------------------------------------------------------------|---------------------------------------------------------------------|---------------------------------------------------------------------|-----------------------------------------|----------------------------------|-----------------------------------------------------|--------------------------------------|-----------------------------|
| <b>MT-180113</b>      |                                           |                                                                     |                                                                     |                                                                     |                                         |                                  |                                                     |                                      |                             |
| 1 <sup>st</sup> cloud | 145                                       | 1.34±0.03                                                           | 0.41±0.01                                                           | 4.3±0.5                                                             | 6.0±0.5                                 | 3.1±0.3·10 <sup>-3</sup>         | 12±2                                                | 14±2                                 | 6.7±0.9·10 <sup>-3</sup>    |
| 2 <sup>nd</sup> cloud | 12                                        | 0.59±0.03                                                           | 0.16±0.01                                                           | 1.8±0.2                                                             | 2.5±0.3                                 | 1.3±0.1·10 <sup>-3</sup>         | 5±2                                                 | 6±2                                  | 2.9±0.9·10 <sup>-3</sup>    |
| <b>MT-210113</b>      |                                           |                                                                     |                                                                     |                                                                     |                                         |                                  |                                                     |                                      |                             |
| 1 <sup>st</sup> cloud | 265                                       | 0.44±0.03                                                           | 0.21±0.01                                                           | 25±32                                                               | 25±33                                   | 12±16·10 <sup>-3</sup>           | 44±12                                               | 45±12                                | 22±6·10 <sup>-3</sup>       |
| 2 <sup>nd</sup> cloud | 91                                        | 0.24±0.03                                                           | 0.16±0.01                                                           | 33±26                                                               | 33±26                                   | 16±13·10 <sup>-3</sup>           | 14±6                                                | 14±7                                 | 6.9±3.2·10 <sup>-3</sup>    |
| <b>MT-230113</b>      |                                           |                                                                     |                                                                     |                                                                     |                                         |                                  |                                                     |                                      |                             |
| 1 <sup>st</sup> cloud | 183                                       | 0.14±0.03                                                           | 0.04±0.01                                                           | 2.6±3.3                                                             | 2.8±3.3                                 | 2.9±3.4·10 <sup>-3</sup>         | 16±4                                                | 16±4                                 | 16±4·10 <sup>-3</sup>       |
| 2 <sup>nd</sup> cloud | 87                                        | 0.22±0.03                                                           | 0.07±0.01                                                           | 1.9±0.4                                                             | 2.2±0.5                                 | 2.3±0.5·10 <sup>-3</sup>         | 25±3                                                | 26±3                                 | 26±4·10 <sup>-3</sup>       |

<sup>a</sup> Measurement uncertainty ~50%. <sup>b</sup> calculated by log-normal fitting of the 2<sup>nd</sup> mode produced during clouds.

## S2.2 Repartitioning of water soluble VOCs into cloud droplets

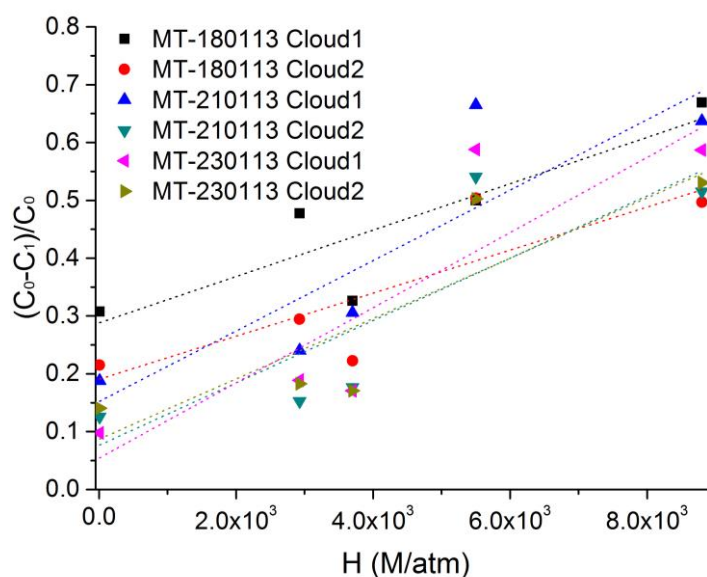

Figure S1. Linear relation between the relative decrease in gas phase concentrations of water soluble VOCs during cloud events and their Henry's law constant ( $H$ ) for acrolein (Sander, 2015), hydroxyacetone (Ito et al., 2007), methylglyoxal (Ito et al., 2007), formic acid (Sander, 2015) and acetic acid (Sander, 2015). Dotted lines show linear regressions ( $r^2$  0.61-0.71).

## S2.3 Ratios $\text{NO}^+/\text{NO}_2^+$ and $\text{NH}_4^+/\text{NO}_3^-$ from HR-ToF-AMS measurements in methacrolein and isoprene experiments, inorganic salts and organonitrogen compounds

Table S4. Measured  $\text{NO}^+/\text{NO}_2^+$  (mass ratio) and  $\text{NH}_4^+/\text{NO}_3^-$  (molar ratio) in methacrolein experiments during cloud events and corresponding values for standard compounds.

| Experiments                             | Events                | $\text{NO}^+/\text{NO}_2^+$<br>(clouds) | $\text{NH}_4^+/\text{NO}_3^-$<br>(molar ratio) | Description of experiment         | References                      |
|-----------------------------------------|-----------------------|-----------------------------------------|------------------------------------------------|-----------------------------------|---------------------------------|
| MT-180113                               | 1 <sup>st</sup> cloud | 2.36±0.12                               | 1.07±0.02                                      | methacrolein triphasic            | This study                      |
|                                         | 2 <sup>nd</sup> cloud | 2.58±0.32                               | 1.08±0.08                                      |                                   |                                 |
| MT-210113                               | 1 <sup>st</sup> cloud | 3.34±0.33                               | 1.78±0.13                                      | methacrolein triphasic            | This study                      |
|                                         | 2 <sup>nd</sup> cloud | 3.51±0.49                               | 2.55±0.41                                      |                                   |                                 |
| MT-230113                               | 1 <sup>st</sup> cloud | 2.67±0.30                               | 1.15±0.18                                      | methacrolein triphasic            | This study                      |
|                                         | 2 <sup>nd</sup> cloud | 2.66±0.22                               | 1.11±0.08                                      |                                   |                                 |
| MT-130614                               | 1 <sup>st</sup> cloud | 2.68±0.17                               | 1.03±0.60                                      | methacrolein triphasic (60% RH)   | This study                      |
|                                         | 2 <sup>nd</sup> cloud | 2.95±0.35                               | 0.95±0.16                                      |                                   |                                 |
| IT-280113                               | 1 <sup>st</sup> cloud | 2.02±0.10                               | 1.01±0.02                                      | isoprene triphasic                | (Brégonzio-Rozier et al., 2016) |
|                                         | 2 <sup>nd</sup> cloud | 1.99±0.06                               | 1.02±0.03                                      |                                   |                                 |
| ID-300113                               | 1 <sup>st</sup> cloud | 2.01±0.12                               | 1.02±0.04                                      | isoprene diphasic                 | (Brégonzio-Rozier et al., 2016) |
|                                         | 2 <sup>nd</sup> cloud | 1.96±0.13                               | 1.00±0.02                                      |                                   |                                 |
| $\text{NH}_4\text{NO}_3$                |                       | 2.44                                    | 1.00                                           | ammonium nitrate standard         | This study                      |
| $\text{NaNO}_3$                         |                       | 2.4                                     |                                                | sodium nitrate standard           | (Bruns et al., 2010)            |
|                                         |                       | 29                                      |                                                |                                   | (Rollins et al., 2010)          |
|                                         |                       | 80                                      |                                                |                                   | (Bruns et al., 2010)            |
| $\text{NaNO}_2$                         |                       | 73±6                                    |                                                | sodium nitrite standard           | This study                      |
| $\text{C}_4\text{H}_9\text{NO}_4$       |                       | 1.83                                    |                                                | 1-hydroxy-butane-2-nitrate        | (Rollins et al., 2010)          |
| $\text{C}_{10}\text{H}_{17}\text{NO}_4$ |                       | 0.99                                    |                                                | 3-hydroxy-pinene-2-nitrate        | (Rollins et al., 2010)          |
| $\text{C}_{10}\text{H}_{17}\text{NO}_4$ |                       | 5.30                                    |                                                | 2-hydroxy-limonene-1-nitrate      | (Rollins et al., 2010)          |
| $\text{C}_{15}\text{H}_{25}\text{NO}_4$ |                       | 4.48                                    |                                                | 3-hydroxy-caryophyllene-4-nitrate | (Rollins et al., 2010)          |
| $\text{C}_6\text{H}_9\text{NO}_6$       |                       | 10-15                                   |                                                | isosorbide 5-mononitrate          | (Bruns et al., 2010)            |
| $\text{C}_3\text{H}_4\text{NO}_3$       |                       | 5                                       |                                                | nitroxyacetone standard           | This study                      |
| $\text{C}_5\text{H}_{11}\text{NO}_2$    |                       | 5.5                                     |                                                | isopentyl nitrite standard        | This study                      |

## S2.4 Results from MonomerHunter of high-resolution data

Table S5. Monomers extracted using “MonomerHunter” from CHO compounds detected in HRMS analysis of SOA from the photooxidation of methacrolein in control, triphasic, triphasic at 60% RH and aqueous phase experiments. Monomers selected for Figure 8 are highlighted in bold green.

| Monomers                                       | N pairs<br>control experiments | N pairs<br>triphasic experiments | N pairs<br>triphasic experiments<br>at 60% RH | N pairs<br>aqueous experiments | Tentative assignment                                        | References                  |
|------------------------------------------------|--------------------------------|----------------------------------|-----------------------------------------------|--------------------------------|-------------------------------------------------------------|-----------------------------|
| <b>CH<sub>2</sub></b>                          | 218                            | 109                              | 761                                           | 791                            | methyl                                                      |                             |
| <b>CH<sub>2</sub>O</b>                         | 149                            | 68                               | 657                                           | 777                            | formaldehyde                                                |                             |
| <b>C<sub>4</sub>H<sub>6</sub>O<sub>3</sub></b> | 316                            | 107                              | 635                                           | 579                            | 2-methylglyceric acid (-H <sub>2</sub> O)                   | (Nguyen et al., 2011, 2010) |
| <b>O</b>                                       | 125                            | 52                               | 627                                           | 790                            | oxygen                                                      |                             |
| C <sub>2</sub> H <sub>4</sub> O                | 121                            | 102                              | 618                                           | 734                            | acetaldehyde/ethylene glycol                                | (Nguyen et al., 2011)       |
| C <sub>2</sub> H <sub>2</sub> O                | 156                            | 88                               | 589                                           | 731                            | glycolaldehyde                                              | (Nguyen et al., 2011)       |
| <b>C<sub>2</sub>H<sub>4</sub>O<sub>2</sub></b> | 157                            | 80                               | 575                                           | 674                            | glycolaldehyde                                              | (Nguyen et al., 2011)       |
| CO                                             | 109                            | 80                               | 569                                           | 709                            | carbon monoxide                                             |                             |
| C <sub>3</sub> H <sub>4</sub> O                | 117                            | 78                               | 538                                           | 708                            | hydroxyacetone (-H <sub>2</sub> O)                          | (Nguyen et al., 2011)       |
| CH <sub>2</sub> O <sub>2</sub>                 | 124                            | 60                               | 546                                           | 685                            | formic acid                                                 | (Nguyen et al., 2010)       |
| C <sub>3</sub> H <sub>4</sub> O <sub>2</sub>   | 124                            | 66                               | 547                                           | 659                            | lactic acid/methylglyoxal, acrylic acid/methylglyoxal       | (Nguyen et al., 2011, 2010) |
| <b>C<sub>3</sub>H<sub>4</sub>O<sub>3</sub></b> | 182                            | 68                               | 564                                           | 559                            | pyruvic acid/hydrolyzed methylglyoxal                       | (Nguyen et al., 2011, 2010) |
| C <sub>3</sub> H <sub>6</sub> O <sub>2</sub>   | 98                             | 71                               | 529                                           | 644                            | hydroxyacetone                                              | (Nguyen et al., 2011)       |
| <b>C<sub>3</sub>H<sub>6</sub>O</b>             | 73                             | 46                               | 538                                           | 677                            | acetone                                                     |                             |
| <b>C<sub>2</sub>H<sub>2</sub>O<sub>2</sub></b> | 109                            | 49                               | 533                                           | 641                            | hydroxyacetic acid (-H <sub>2</sub> O)                      | (Nguyen et al., 2011)       |
| <b>C<sub>5</sub>H<sub>8</sub>O<sub>3</sub></b> | 160                            | 80                               | 525                                           | 567                            | 2-hydroxy-2-methylbutanedial                                | (Nguyen et al., 2011)       |
| C <sub>4</sub> H <sub>6</sub> O <sub>2</sub>   | 101                            | 50                               | 508                                           | 658                            | methacrylic acid/2-methylglyceraldehyde (-H <sub>2</sub> O) | (Nguyen et al., 2011, 2010) |
| H <sub>2</sub> O                               | 81                             | 59                               | 444                                           | 718                            | water                                                       |                             |
| <b>C<sub>4</sub>H<sub>6</sub>O</b>             | 68                             | 43                               | 479                                           | 687                            | methacrolein                                                |                             |
| O <sub>2</sub>                                 | 80                             | 33                               | 523                                           | 641                            | oxygen                                                      |                             |
| CO <sub>2</sub>                                | 71                             | 34                               | 504                                           | 598                            | carbon dioxide                                              |                             |
| C <sub>2</sub> H <sub>2</sub> O <sub>3</sub>   | 118                            | 32                               | 523                                           | 522                            |                                                             |                             |
| C <sub>4</sub> H <sub>8</sub> O <sub>2</sub>   | 60                             | 62                               | 455                                           | 597                            |                                                             |                             |
| C <sub>5</sub> H <sub>8</sub> O <sub>2</sub>   | 67                             | 39                               | 436                                           | 608                            |                                                             |                             |
| C <sub>5</sub> H <sub>8</sub> O <sub>4</sub>   | 132                            | 48                               | 472                                           | 486                            |                                                             |                             |
| C <sub>3</sub> H <sub>6</sub> O <sub>3</sub>   | 96                             | 41                               | 404                                           | 573                            |                                                             |                             |
| C <sub>4</sub> H <sub>8</sub> O                | 42                             | 23                               | 446                                           | 582                            |                                                             |                             |
| C <sub>2</sub> H <sub>4</sub> O <sub>3</sub>   | 82                             | 28                               | 393                                           | 581                            | glycolic acid                                               | (Nguyen et al., 2010)       |
| C <sub>4</sub> H <sub>6</sub> O <sub>4</sub>   | 105                            | 32                               | 475                                           | 471                            |                                                             |                             |
| C <sub>5</sub> H <sub>8</sub> O                | 37                             | 21                               | 409                                           | 591                            | 2-methyl-2-butenal                                          |                             |
| C <sub>4</sub> H <sub>8</sub> O <sub>3</sub>   | 75                             | 36                               | 378                                           | 562                            | 2-MG aldehyde                                               | (Nguyen et al., 2011)       |
| <b>C<sub>4</sub>H<sub>8</sub>O<sub>4</sub></b> | 70                             | 37                               | 330                                           | 491                            | 2-methylglyceric acid                                       | (Nguyen et al., 2011, 2010) |

**Table S6. Monomers extracted using “MonomerHunter” from CHNO compounds detected in HRMS analysis of SOA from the photooxidation of methacrolein in control, triphasic and triphasic at 60% RH experiments. Monomers selected for Figure 8 are highlighted in bold green, N-containing monomers are highlighted in bold red.**

| Monomers                                       | N pairs<br>control experiments | N pairs<br>triphasic experiments | N pairs<br>triphasic experiments<br>at 60% RH | Tentative assignment                                        | References                  |
|------------------------------------------------|--------------------------------|----------------------------------|-----------------------------------------------|-------------------------------------------------------------|-----------------------------|
| <b>C<sub>4</sub>H<sub>6</sub>O<sub>3</sub></b> | 205                            | 205                              | 500                                           | 2-methylglyceric acid acetic anhydride                      | (Nguyen et al., 2011, 2010) |
| <b>C<sub>5</sub>H<sub>8</sub>O<sub>3</sub></b> | 375                            | 124                              | 306                                           | 2-hydroxy-2-methylbutanedial                                | (Nguyen et al., 2011)       |
| <b>C<sub>2</sub>H<sub>4</sub>O<sub>2</sub></b> | 301                            |                                  | 337                                           | glycolaldehyde                                              | (Nguyen et al., 2011)       |
| <b>CH<sub>2</sub></b>                          | 202                            | 139                              | 292                                           | methyl                                                      |                             |
| <b>CH<sub>2</sub>O</b>                         | 304                            |                                  | 284                                           | formaldehyde                                                |                             |
| C <sub>3</sub> H <sub>4</sub> O <sub>2</sub>   | 266                            | 29                               | 246                                           | lactic acid/methylglyoxal, acrylic acid/methylglyoxal       | (Nguyen et al., 2011, 2010) |
| C <sub>2</sub> H <sub>2</sub> O <sub>3</sub>   | 217                            | 45                               | 245                                           |                                                             |                             |
| CO                                             | 141                            | 74                               | 250                                           | carbon monoxide                                             |                             |
| CH <sub>2</sub> O <sub>2</sub>                 | 194                            |                                  | 262                                           | formic acid                                                 | (Nguyen et al., 2010)       |
| C <sub>3</sub> H <sub>4</sub> O                | 170                            |                                  | 248                                           | hydroxyacetone (–H <sub>2</sub> O)                          | (Nguyen et al., 2011)       |
| <b>C<sub>3</sub>H<sub>4</sub>O<sub>3</sub></b> |                                | 93                               | 313                                           | pyruvic acid/hydrolyzed methylglyoxal                       | (Nguyen et al., 2011, 2010) |
| C <sub>5</sub> H <sub>8</sub> O <sub>5</sub>   | 149                            | 52                               | 196                                           |                                                             |                             |
| C <sub>3</sub> H <sub>6</sub> O <sub>2</sub>   | 142                            |                                  | 252                                           | hydroxyacetone                                              | (Nguyen et al., 2011)       |
| C <sub>2</sub> H <sub>4</sub> O                | 131                            |                                  | 258                                           | acetaldehyde/ethylene glycol                                | (Nguyen et al., 2011)       |
| C <sub>4</sub> H <sub>6</sub> O <sub>4</sub>   | 168                            | 12                               | 186                                           |                                                             |                             |
| C <sub>2</sub> H <sub>2</sub> O                | 78                             | 115                              | 165                                           | glycolaldehyde                                              | (Nguyen et al., 2011)       |
| C <sub>4</sub> H <sub>6</sub> O <sub>2</sub>   | 147                            | 18                               | 192                                           | methacrylic acid/2-methylglyceraldehyde (–H <sub>2</sub> O) | (Nguyen et al., 2011, 2010) |
| C <sub>5</sub> H <sub>6</sub> O <sub>4</sub>   | 105                            | 50                               | 182                                           |                                                             |                             |
| O                                              |                                | 28                               | 263                                           | oxygen                                                      |                             |
| CO <sub>3</sub>                                | 110                            |                                  | 199                                           |                                                             |                             |
| C <sub>4</sub> H <sub>6</sub> O <sub>5</sub>   | 95                             | 28                               | 168                                           |                                                             |                             |
| C <sub>3</sub> H <sub>6</sub> O <sub>4</sub>   | 85                             | 29                               | 166                                           | glyceric acid                                               |                             |
| C <sub>5</sub> H <sub>8</sub> O <sub>4</sub>   | 80                             |                                  | 199                                           |                                                             |                             |
| C <sub>3</sub> H <sub>6</sub> O <sub>3</sub>   | 131                            |                                  | 143                                           |                                                             |                             |
| H <sub>2</sub> O                               | 87                             |                                  | 185                                           | water                                                       |                             |
| C <sub>5</sub> H <sub>6</sub> O <sub>3</sub>   | 118                            |                                  | 154                                           |                                                             |                             |
| C <sub>2</sub> H <sub>4</sub> O <sub>3</sub>   | 122                            | 12                               | 135                                           | glycolic acid                                               | (Nguyen et al., 2010)       |
| C <sub>5</sub> H <sub>8</sub> O <sub>2</sub>   | 67                             | 11                               | 176                                           |                                                             |                             |
| C <sub>4</sub> H <sub>4</sub> O <sub>3</sub>   | 101                            |                                  | 149                                           |                                                             |                             |
| C <sub>5</sub> H <sub>6</sub> O <sub>5</sub>   | 95                             |                                  | 150                                           |                                                             |                             |
| C <sub>4</sub> H <sub>4</sub> O <sub>2</sub>   | 78                             |                                  | 165                                           |                                                             |                             |
| C <sub>5</sub> H <sub>10</sub> O <sub>4</sub>  | 54                             | 28                               | 146                                           |                                                             |                             |
| C <sub>5</sub> H <sub>6</sub> O <sub>6</sub>   | 89                             |                                  | 137                                           |                                                             |                             |
| C <sub>3</sub> H <sub>4</sub> O <sub>5</sub>   | 68                             |                                  | 152                                           |                                                             |                             |
| <b>C<sub>4</sub>H<sub>6</sub>O</b>             |                                | 34                               | 186                                           | methacrolein                                                |                             |
| <b>C<sub>4</sub>H<sub>8</sub>O<sub>4</sub></b> | 68                             |                                  | 147                                           | 2-methylglyceric acid                                       | (Nguyen et al., 2011, 2010) |

|                |     |     |                                |                       |
|----------------|-----|-----|--------------------------------|-----------------------|
| $C_4H_8O_3$    | 88  | 124 | 2-MG aldehyde                  | (Nguyen et al., 2011) |
| $C_3H_4O_4$    | 50  | 161 |                                |                       |
| $C_5H_8O$      | 47  | 145 | 2-methyl-2-butenal             |                       |
| $C_2H_2O_2$    |     | 200 | hydroxyacetic acid ( $-H_2O$ ) | (Nguyen et al., 2011) |
| $C_5H_6O_2$    | 68  | 130 |                                |                       |
| $CHNO_2$       | 112 | 75  |                                |                       |
| $C_4H_4O_6$    | 57  | 128 |                                |                       |
| $C_3H_6O$      |     | 183 | acetone                        |                       |
| $C_5H_7NO_5$   | 99  | 23  | 55                             |                       |
| $C_5H_8O_6$    | 75  | 97  |                                |                       |
| $C_4H_8O_2$    |     | 171 |                                |                       |
| $C_5H_{10}O_3$ | 44  | 127 | 2,4-dihydroxy-2-methylbutanal  |                       |

## S2.5 Oligomer series of CHNO compounds in smog chamber experiments

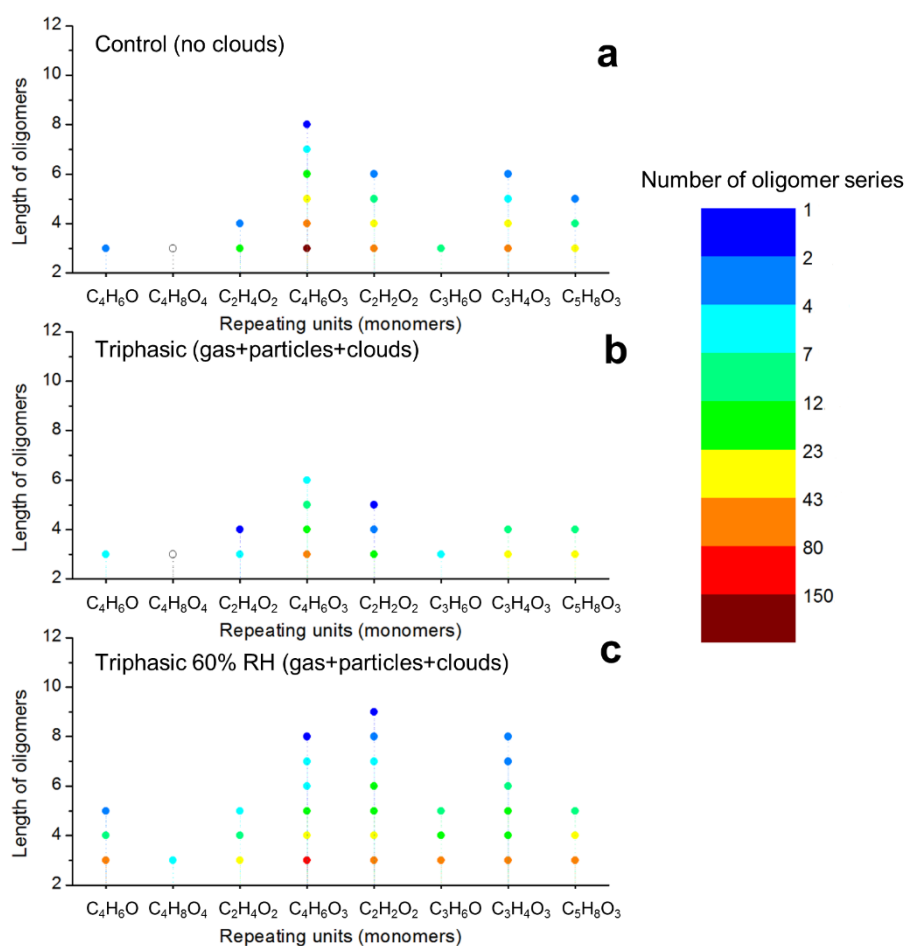

**Figure S2.** N-containing trimers and longer oligomers detected in methacrolein photooxidation experiments in control conditions without clouds (a), in triphasic conditions with two cloud events (b) and in triphasic conditions starting at 60% RH with two cloud events (c). Molecular formulas of the repeating units can be associated with (from left to right) methacrolein ( $C_4H_6O$ ), 2-methylglyceric acid ( $C_4H_8O_4$ ), glycolaldehyde ( $C_2H_4O_2$ ), methylglyceric acid ( $C_4H_6O_3$  because of  $H_2O$  loss), hydroxyacetic acid ( $C_2H_2O_2$ ), acetone ( $C_3H_6O$ ), pyruvic acid/hydrolyzed methylglyoxal ( $C_3H_4O_3$ ) and 2-hydroxy-2-methylbutanedial ( $C_5H_8O_3$ ).

## S2.6 Oligomer series in aqueous phase experiments

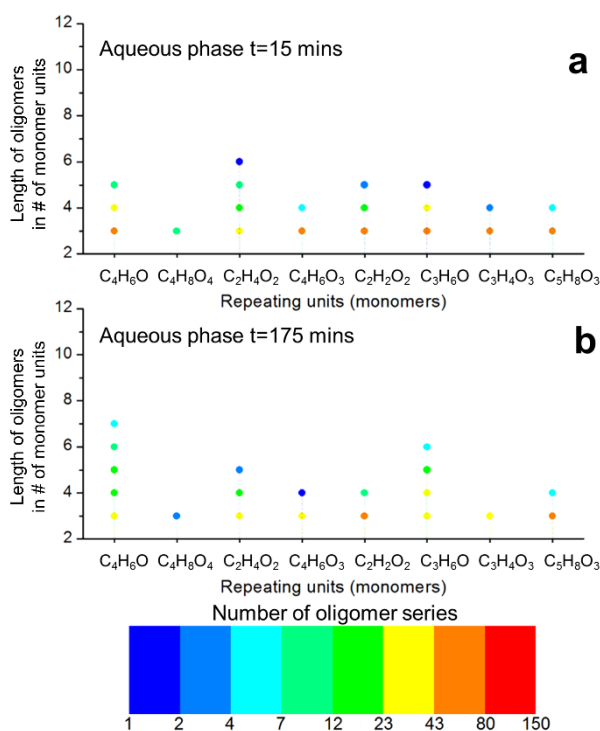

Figure S3. Trimers and longer oligomers (CHO compounds only) detected in methacrolein photooxidation experiments in  $NO_x$  free conditions in the aqueous phase with 15 min reaction time (a) and 175 min reaction time (b). Molecular formulas of the repeating units can be associated with (from left to right) methacrolein ( $C_4H_6O$ ), 2-methylglyceric acid ( $C_4H_8O_4$ ), glycolaldehyde ( $C_2H_4O_2$ ), methylglyceric acid ( $C_4H_6O_3$  because of  $H_2O$  loss), hydroxyacetic acid ( $C_2H_2O_2$ ), acetone ( $C_3H_6O$ ), pyruvic acid/hydrolyzed methylglyoxal ( $C_3H_4O_3$ ) and 2-hydroxy-2-methylbutanedial ( $C_5H_8O_3$ ).

## References

- Arakaki, T., Anastasio, C., Kuroki, Y., Nakajima, H., Okada, K., Kotani, Y., Handa, D., Azechi, S., Kimura, T., Tsuchi, A., Miyagi, Y., 2013. A general scavenging rate constant for reaction of hydroxyl radical with organic carbon in atmospheric waters. *Environ. Sci. Technol.* 47, 8196–8203. doi:10.1021/es401927b
- Brégonzio-Rozier, L., Giorio, C., Siekmann, F., Pangui, E., Morales, S.B., Temime-Roussel, B., Gratien, A., Michoud, V., Cazaunau, M., DeWitt, H.L., Tapparo, A., Monod, A., Doussin, J.-F., 2016. Secondary organic aerosol formation from isoprene photooxidation during cloud condensation–evaporation cycles. *Atmos. Chem. Phys.* 16, 1747–1760. doi:10.5194/acp-16-1747-2016
- Brégonzio-Rozier, L., Siekmann, F., Giorio, C., Pangui, E., Morales, S.B., Temime-Roussel, B., Gratien, A., Michoud, V., Ravier, S., Cazaunau, M., Tapparo, A., Monod, A., Doussin, J.F., 2015. Gaseous products and secondary organic aerosol formation during long term oxidation of isoprene and methacrolein. *Atmos. Chem. Phys.* 15, 2953–2968. doi:10.5194/acp-15-2953-2015
- Bruns, E.A., Perraud, V., Zelenyuk, A., Ezell, M.J., Johnson, S.N., Yu, Y., Imre, D., Finlayson-Pitts, B.J., Alexander, M.L., 2010. Comparison of FTIR and particle mass spectrometry for the measurement of particulate organic nitrates. *Environ. Sci. Technol.* 44, 1056–1061.



- Ervens, B., Sorooshian, A., Lim, Y.B., Turpin, B.J., 2014. Key parameters controlling OH-initiated formation of secondary organic aerosol in the aqueous phase (aqSOA). *J. Geophys. Res. Atmos.* 119, 3997–4016. doi:10.1002/2013JD021021
- Herrmann, H., Hoffmann, D., Schaefer, T., Brüner, P., Tilgner, A., 2010. Tropospheric aqueous-phase free-radical chemistry: Radical sources, spectra, reaction kinetics and prediction tools. *ChemPhysChem* 11, 3796–3822. doi:10.1002/cphc.201000533
- Herrmann, H., Schaefer, T., Tilgner, A., Styler, S.A., Weller, C., Teich, M., Otto, T., 2015. Tropospheric Aqueous-Phase Chemistry: Kinetics, Mechanisms, and Its Coupling to a Changing Gas Phase. *Chem. Rev.* 115, 4259–4334. doi:10.1021/cr500447k
- Ito, A., Sillman, S., Penner, J.E., 2007. Effects of additional nonmethane volatile organic compounds organic nitrates, and direct emissions of oxygenates organic species of global tropospheric chemistry. *J. Geophys. Res. Atmos.* 112, 1–21. doi:10.1029/2005JD006556
- Nguyen, T.B., Bateman, A.P., Bones, D.L., Nizkorodov, S.A., Laskin, J., Laskin, A., 2010. High-resolution mass spectrometry analysis of secondary organic aerosol generated by ozonolysis of isoprene. *Atmos. Environ.* 44, 1032–1042. doi:10.1016/j.atmosenv.2009.12.019
- Nguyen, T.B., Laskin, J., Laskin, A., Nizkorodov, S.A., 2011. Nitrogen-containing organic compounds and oligomers in secondary organic aerosol formed by photooxidation of isoprene. *Environ. Sci. Technol.* 45, 6908–18. doi:10.1021/es201611n
- Renard, P., Siekmann, F., Gandolfo, A., Socorro, J., Salque, G., Ravier, S., Quivet, E., Clément, J.-L., Traikia, M., Delort, A.-M., Voisin, D., Vuitton, V., Thissen, R., Monod, A., 2013. Radical mechanisms of methyl vinyl ketone oligomerization through aqueous phase OH-oxidation: on the paradoxical role of dissolved molecular oxygen. *Atmos. Chem. Phys.* 13, 6473–6491. doi:10.5194/acp-13-6473-2013
- Rollins, A.W., Fry, J.L., Hunter, J.F., Kroll, J.H., Worsnop, D.R., Singaram, S.W., Cohen, R.C., 2010. Elemental analysis of aerosol organic nitrates with electron ionization high-resolution mass spectrometry. *Atmos. Meas. Tech.* 3, 301–310. doi:10.5194/amt-3-301-2010
- Sander, R., 2015. Compilation of Henry's law constants (version 4.0) for water as solvent. *Atmos. Chem. Phys.* 15, 4399–4981. doi:10.5194/acp-15-4399-2015
- Wold, S., Esbensen, K., Geladi, P., 1987. Principal component analysis. *Chemom. Intell. Lab. Syst.* 2, 37–52. doi:10.1016/0169-7439(87)80084-9
